# Supplementary material for: Comparative Study of Solvent Effect for tryptophan Oxidation by Different Oxidants
Source: Research Square preprint supplement (doi:10.21203/rs.3.rs-3513634/v1), 2023-11-01
Supplement: Supplementary file 1 [file 810084b31ee483c39164c164.docx]

**Table -1 -Characteristics for the tryptophan**

**oxidation by given oxidants at 308 K**

| oN.S | Oxidant | type | Weight |
| --- | --- | --- | --- |
| 1 | QnFC | + | 0.2 |
| 2 | IFC | + | 0.2 |
| 3 | QxDC | + | 0.2 |
| 4 | ICC | + | 0.2 |
| 5 | QnCC | + | 0.2 |

**Table -2 -** **At 308 K decision matrix of rate constants (10 4 k 2 s -1 ) for the tryptophan oxidation by given oxidants**

| ↓ tnevlos  →tnadixo | QnFC | IFC | QxDC | ICC | QnCC |
| --- | --- | --- | --- | --- | --- |
| DMSO | 0.00779 | 0.00874 | 0.00674 | 0.00896 | 0.00832 |
| DMF | 0.00467 | 0.00616 | 0.00439 | 0.00554 | 0.00542 |
| ACETONE | 0.00378 | 0.00401 | 0.00313 | 0.00391 | 0.00408 |
| DCM | 0.00366 | 0.00453 | 0.00322 | 0.00378 | 0.00386 |
| DCE | 0.00388 | 0.00428 | 0.00341 | 0.00415 | 0.00439 |

**Table -3 -** **Normalized matrix calculated using rate constants (10 4 k 2 s -1 ) for the tryptophan oxidation by given oxidants at 308 K**

| ↓ tnevlos  →tnadixo | QnFC | IFC | QxDC | ICC | QnCC |
| --- | --- | --- | --- | --- | --- |
| DMSO | 0.696 | 0.672 | 0.686 | 0.713 | 0.681 |
| DMF | 0.417 | 0.473 | 0.447 | 0.441 | 0.443 |
| ACETONE | 0.338 | 0.308 | 0.319 | 0.311 | 0.334 |
| DCM | 0.327 | 0.348 | 0.328 | 0.301 | 0.316 |
| DCE | 0.347 | 0.329 | 0.347 | 0.33 | 0.359 |

**Table -4 -** **Weighted normalized matrix calculated using normalized matrix for the tryptophan oxidation by given oxidants at 308 K**

| tnevlos↓  →tnadixo | QnFC | IFC | QxDC | ICC | QnCC |
| --- | --- | --- | --- | --- | --- |
| DMSO | 0.139 | 0.134 | 0.137 | 0.143 | 0.136 |
| DMF | 0.083 | 0.095 | 0.089 | 0.088 | 0.089 |
| ACETONE | 0.068 | 0.062 | 0.064 | 0.062 | 0.067 |
| DCM | 0.065 | 0.07 | 0.066 | 0.06 | 0.063 |
| DCE | 0.069 | 0.066 | 0.069 | 0.066 | 0.072 |

**Table -5 -The positive and negative ideal values for the trytophan oxidation by given oxidants at 308 K**

| tnadixo | Positive ideal | Negative ideal |
| --- | --- | --- |
| QnFC | 0.139 | 0.065 |
| IFC | 0.134 | 0.062 |
| QxDC | 0.137 | 0.064 |
| ICC | 0.143 | 0.06 |
| QnCC | 0.136 | 0.063 |

**Table -6 -Distance to positive and negative ideal points for the trytophan oxidation by given oxidants at 308 K**

| tnevlos | Distance to positive ideal | Distance to negative ideal |
| --- | --- | --- |
| DMSO | 0 | 0.168 |
| DMF | 0.11 | 0.059 |
| ACETONE | 0.165 | 0.005 |
| DCM | 0.164 | 0.008 |
| DCE | 0.156 | 0.013 |

**Table -7 -The ci values and ranking of Solvents for the tryptophan oxidation by given oxidants at 308 K**

| tnevlos | Ci | rank |
| --- | --- | --- |
| DMSO | 1 | 1 |
| DMF | 0.349 | 2 |
| ACETONE | 0.028 | 5 |
| DCM | 0.048 | 4 |
| DCE | 0.078 | 3 |
